# Supplementary material
Source: publisher figshare collection journal article supplement (https://sage.figshare.com/ndownloader/files/16118042)
Supplement: Supplementary file 1 [file 16118042]

Supplementary figures:

Figure - 1: Different dimensions of acceptability on the basis of no discernibly unusual taste vs. discernibly unusual taste

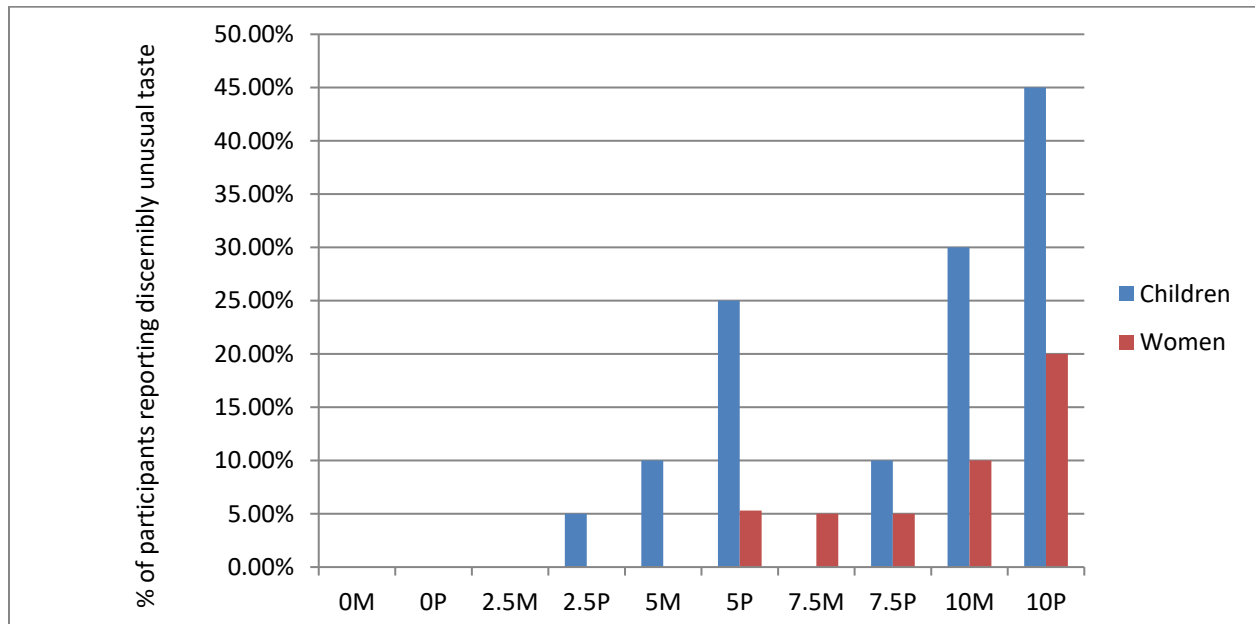

discernibly unusual taste: whose overall hedonic scale below 3; p= plain rice only, m= rice mixed with lentil and papaya

**Figure 2: Study Design**

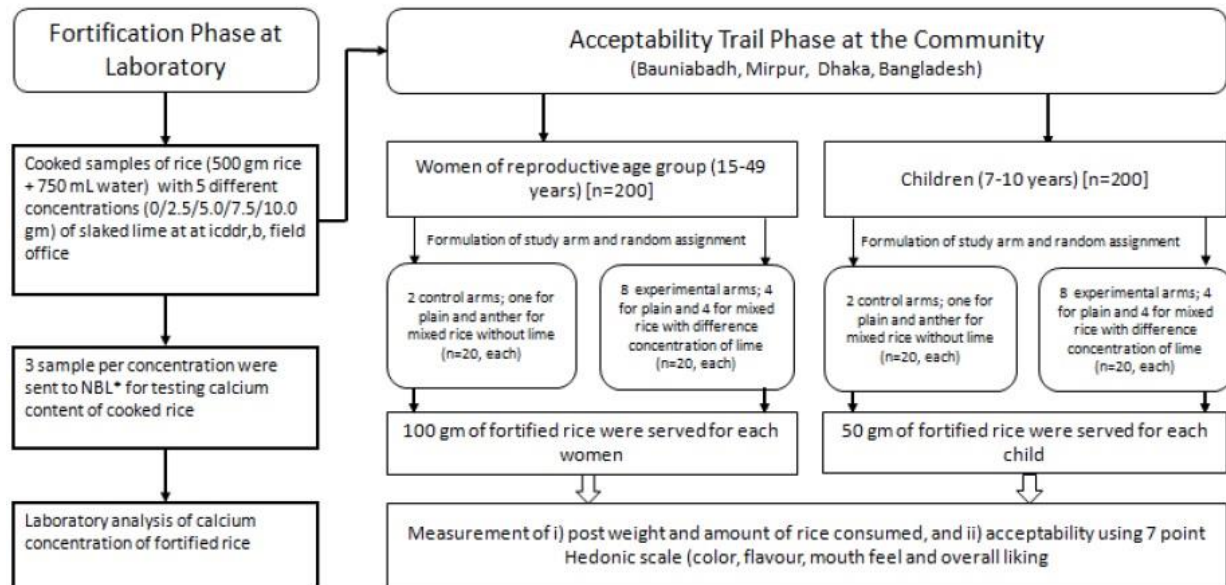

\*NBL: Nutritional Biochemistry Laboratory of icddr, b
